# Supplementary material for: In Vitro Techniques for Shipping of Micropropagated Plant Materials
Source: MDPI journal article supplement (doi:10.3390/horticulturae8070609), 2022-07-06
Supplement: s1 [file Figure S1.pdf › Figure S1.pdf]

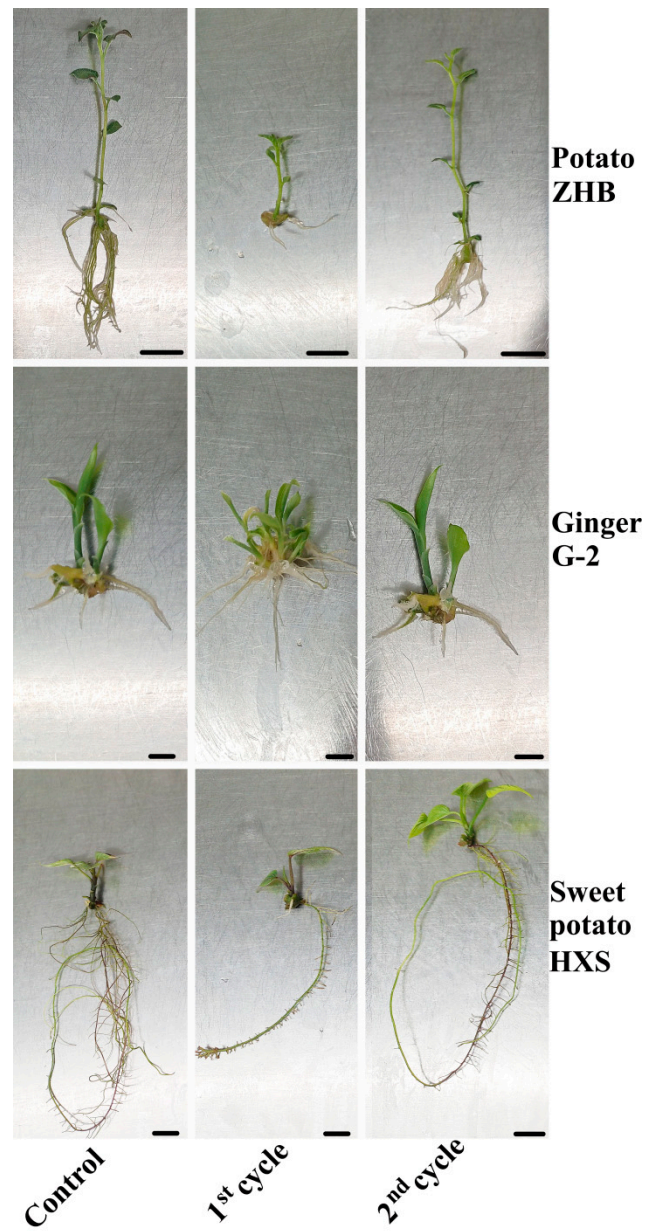

**Figure S1.** Growth feature of ZHB, G-2 and HXS after recovery on MS medium. Bar represents 1 cm in each histogram.
