# Supplementary material for: In Vitro Techniques for Shipping of Micropropagated Plant Materials
Source: MDPI journal article supplement (doi:10.3390/horticulturae8070609), 2022-07-06
Supplement: s1 [file Table S1.pdf › Table S1.pdf]

**Table S1:** SSR and ISSR primers and primer sequences.

|            | Primer name |   | Sequence (5'-3')       |
|------------|-------------|---|------------------------|
| Potato ZHB |             |   |                        |
| SSR        | RSS2428     | F | TGTAGTGGTGGTGAAAGGAAGA |
|            |             | R | ATTGTTGTTACAGAGGCGGG   |
|            | RSS1457     | F | GATGCAGATCCCACACACTG   |
|            |             | R | TAGCTCCACCACCATTTTCC   |
|            | RSS0881     | F | GACTTCTGGAAACAGCCCAC   |
|            |             | R | TATTTCCCGGGGCTAAATTC   |
|            | RSS2112     | F | TAGCTTCGGAGGAAAGTGGA   |
|            |             | R | GCCGTGTAAGGAAGTGGAAG   |
|            | RSS75       | F | GGGGGAGTTAGTGGGAAGAA   |
|            |             | R | TCGTCACAAGGAAAGGCTCT   |
| ISSR       | 6           |   | ACACACACACACACACTC     |
|            | 8           |   | AGAGAGAGAGAGAGAGAC     |
|            | 13          |   | ACACACACACACACACGC     |
|            | 807         |   | AGAGAGAGAGAGAGAGT      |
|            | 868         |   | GAAGAAGAAGAAGAAGAA     |
| Ginger G-2 |             |   |                        |
| SSR        | RSS2898     | F | ATGATTGCCTCCTCCTCCTT   |
|            |             | R | AGGCTTCTCACCAGACTCCA   |
|            | RSS2114     | F | TTGCGTATTTAGACGAGGGC   |
|            |             | R | GGTCGCATGAGTTCCTTCTC   |
|            | RSS0347     | F | AACTTTGCTATGTCCGGTGG   |
|            |             | R | CAGGAGAAGCAACCAGAAGG   |
|            | RSS2474     | F | GATGGTAATTTCTCAAGGGGG  |
|            |             | R | GTTGGTTGTGCGAAATGGCTT  |
|            | RSS2428     | F | TGTAGTGGTGGTGAAAGGAAGA |
|            |             | R | ATTGTTGTTACAGAGGCGGG   |
| ISSR       | 6           |   | ACACACACACACACACTC     |
|            | 17          |   | AGAGAGAGAGAGAGAGGC     |
|            | 19          |   | AGAGAGAGAGAGAGAGCA     |
|            | 20          |   | AGAGAGAGAGAGAGAGCT     |
|            | 807         |   | AGAGAGAGAGAGAGAGT      |
